# Supplementary material for: Capillary-force-driven self-assembly of carbon nanotubes: from ab initio calculations to modeling of self-assembly
Source: Royal Society of Chemistry journal article supplement (doi:10.1039/d2na00295g), 2022-01-01
Supplement: d2na00295g1.pdf [file d2na00295g1.pdf]

## Supporting Information

### Capillary-Force-Driven Self-Assembly of Carbon Nanotubes: from Ab-Initio Calculations to Modeling of Self-Assembly

*Stefania Carapezzi, \*<sup>a,‡</sup> Gabriele Boschetto, <sup>a,‡</sup> Aida Todri-Sania \*<sup>a</sup>*

<sup>a</sup> Microelectronics Department, LIRMM, University of Montpellier, CNRS, 161 rue Ada,  
Montpellier, 34095 France

\* Address correspondence to stefania.carapezzi@gmail.com and aida.todri@lirmm.fr

<sup>‡</sup> These authors contributed equally to this work.

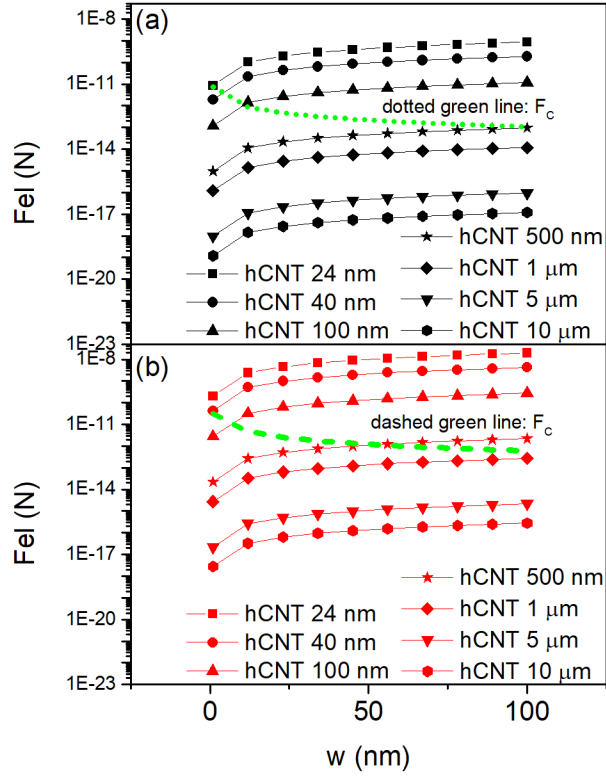

Fig. SI1 Behavior with  $w$  of  $F_c$  from Equation (5) (green lines) and of  $F_{el}$  from Equation (6) (symbols), for (a) Zigzag (6,0) CNT and (b) Zigzag (26,0) CNT.

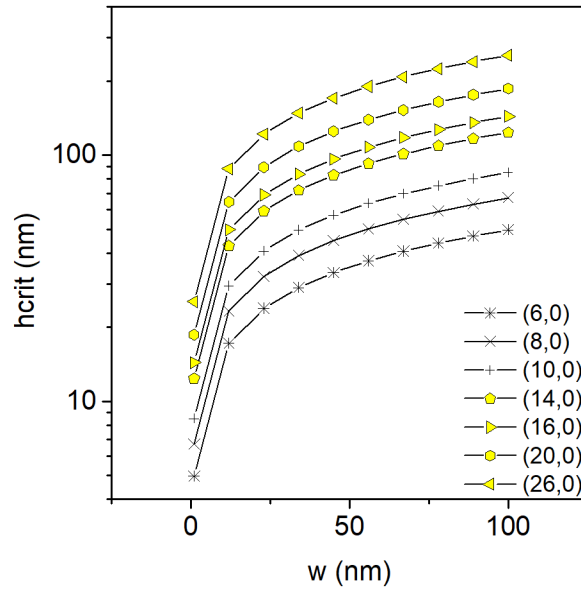

Fig. SI2 Critical height  $h_{crit}$  of lateral collapse by Equation (9), from Zigzag (6,0) CNT to Zigzag (26,0) CNT.
